# Supplementary material for: Differential replication dynamics for large and small Vibrio chromosomes affect gene dosage, expression and location
Source: PubMed Central journal article supplement (PMC2612033; doi:10.1186/1471-2164-9-559), 2008-11-26
Supplement: 1471-2164-9-559-S3.pdf [file 1471-2164-9-559-S3.pdf]

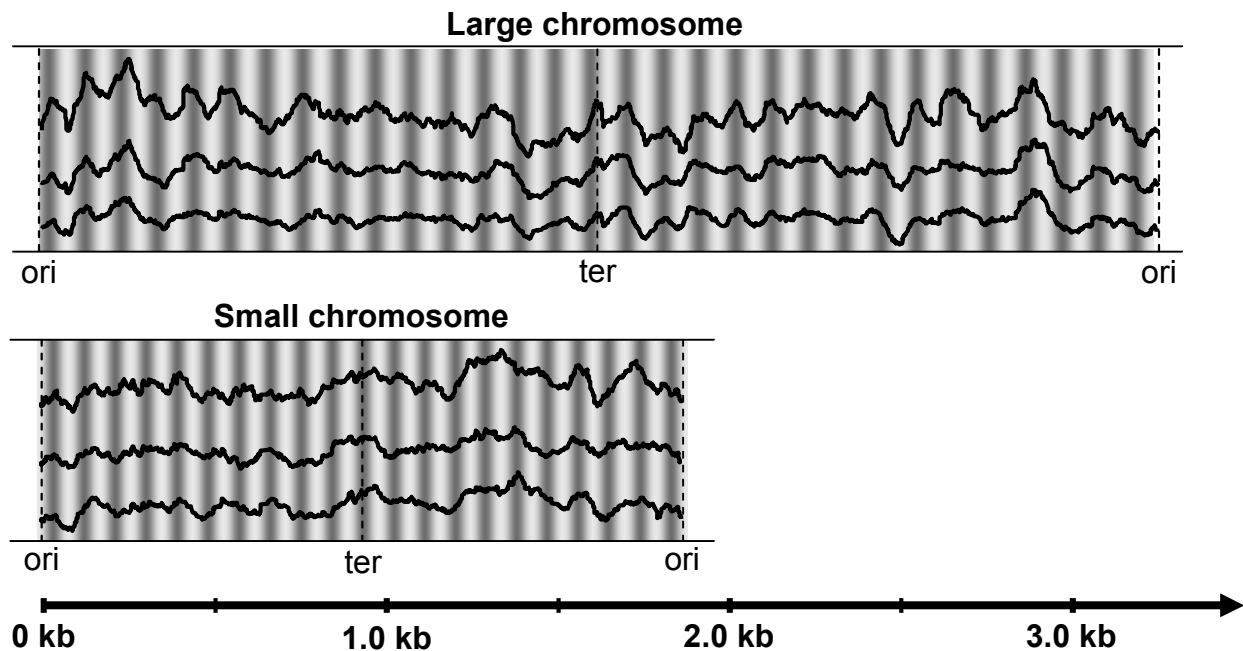

**Additional file 3 - Periodic expression patterns from the large and small chromosome of *V. parahaemolyticus***

Gene expression patterns for the large (upper panel) and the small chromosome (lower panel) taken from Figure 3 are aligned and grids with equally distanced bars were manually fitted to local expression maxima along the chromosomes. A grid with a 107 kb distances between the bars showed the best fit for the large chromosome while a grid with 96 kb distances better reflected local expression maxima on the small.
