# Supplementary material for: Differential replication dynamics for large and small Vibrio chromosomes affect gene dosage, expression and location
Source: PubMed Central journal article supplement (PMC2612033; doi:10.1186/1471-2164-9-559), 2008-11-26
Supplement: 1471-2164-9-559-S4.pdf [file 1471-2164-9-559-S4.pdf]

**Additional file 4 - Distribution of COG classified genes within three different parts of five *Vibrionaceae* genomes**

| COG | Early replicated part of large chromosome |       |       |       |       |        | Late replicated part of large chromosome |      |       |       |       |       | Small chromosome |       |       |       |       |        |
|-----|-------------------------------------------|-------|-------|-------|-------|--------|------------------------------------------|------|-------|-------|-------|-------|------------------|-------|-------|-------|-------|--------|
|     | VP                                        | VC    | VV    | VF    | PP    | ALL    | VP                                       | VC   | VV    | VF    | PP    | ALL   | VP               | VC    | VV    | VF    | PP    | ALL    |
| J   | 107**                                     | 142** | 107** | 125** | 126** | 607**  | 70                                       | 30** | 79    | 60    | 53**  | 292** | 24**             | 24**  | 28**  | 18**  | 35**  | 129**  |
| K   | 90                                        | 109   | 97    | 99*   | 109   | 504**  | 105**                                    | 68   | 95**  | 78*   | 117** | 463** | 178**            | 94*   | 175** | 135** | 184** | 766**  |
| L   | 68**                                      | 88    | 91**  | 73*   | 117   | 437**  | 80                                       | 48   | 99    | 53    | 138   | 418   | 39**             | 42    | 45**  | 37*   | 190** | 353**  |
| D   | 14                                        | 22    | 18*   | 21    | 16    | 91**   | 18                                       | 10   | 19    | 14    | 20    | 81    | 5**              | 9     | 3**   | 11    | 9*    | 37**   |
| V   | 15                                        | 14*   | 16    | 11**  | 15*   | 71**   | 26                                       | 24** | 26    | 20    | 37    | 133*  | 29               | 11    | 30    | 32**  | 38    | 140*   |
| T   | 65                                        | 92**  | 76**  | 64**  | 85    | 382**  | 106                                      | 98** | 126   | 78    | 106   | 514   | 129*             | 93    | 160** | 122** | 101   | 605**  |
| M   | 84*                                       | 102** | 93**  | 121** | 106** | 506**  | 95                                       | 50   | 78    | 54**  | 95    | 372   | 72**             | 29**  | 59**  | 67    | 60**  | 287**  |
| N   | 32                                        | 86**  | 32*   | 38*   | 72**  | 260    | 69                                       | 26   | 79**  | 60**  | 63    | 297** | 59               | 27*   | 44    | 35    | 23**  | 188**  |
| U   | 55**                                      | 72**  | 55**  | 63**  | 64**  | 309**  | 48                                       | 16   | 41    | 26    | 39*   | 170** | 42*              | 6**   | 19**  | 22**  | 43    | 132**  |
| O   | 46                                        | 75    | 43    | 59    | 61    | 284    | 75                                       | 37   | 75**  | 67**  | 77*   | 331** | 56               | 29*   | 42*   | 27**  | 42**  | 196**  |
| C   | 66                                        | 95    | 68    | 72    | 85    | 386    | 94                                       | 51   | 80    | 75    | 113   | 413*  | 77               | 44    | 67    | 54    | 101   | 343**  |
| G   | 57                                        | 71**  | 78    | 80    | 62**  | 348**  | 58**                                     | 60   | 70**  | 40**  | 98    | 326** | 117**            | 70*   | 162** | 86    | 165** | 600**  |
| E   | 109                                       | 130   | 116   | 123   | 128   | 606    | 142                                      | 88   | 129   | 105   | 156   | 620   | 140              | 85    | 137   | 96    | 137   | 595    |
| F   | 29                                        | 51**  | 29    | 40    | 39    | 188**  | 44*                                      | 14   | 42*   | 33    | 50*   | 183** | 18**             | 12*   | 18**  | 12**  | 26**  | 86**   |
| H   | 68**                                      | 94**  | 71**  | 79**  | 85**  | 397**  | 57                                       | 42   | 59    | 46    | 54**  | 258   | 31**             | 15**  | 25**  | 22**  | 29**  | 122**  |
| I   | 22*                                       | 45    | 23    | 33    | 31    | 154*   | 56                                       | 21   | 53*   | 43**  | 52    | 225** | 50               | 17    | 34    | 12**  | 54    | 167    |
| P   | 67                                        | 91    | 69    | 72    | 75    | 374    | 60**                                     | 34*  | 65**  | 56    | 86    | 301** | 120**            | 64    | 95*   | 68    | 86    | 433**  |
| Q   | 9**                                       | 35    | 11**  | 10**  | 17**  | 82**   | 46**                                     | 20   | 40    | 28**  | 39    | 173** | 30               | 12    | 36    | 19    | 51*   | 148    |
| R   | 141                                       | 176   | 145   | 150   | 158   | 770    | 191                                      | 97   | 183   | 147   | 214   | 832   | 204              | 140*  | 198   | 142   | 217   | 901*   |
| S   | 92                                        | 123   | 90    | 100   | 143** | 548    | 142                                      | 82   | 124   | 107** | 119   | 574   | 131              | 87    | 123   | 72*   | 115** | 528    |
| -   | 218**                                     | 295** | 270** | 168** | 164** | 1115** | 429                                      | 202  | 509** | 161** | 409   | 1710  | 470**            | 339** | 485** | 281** | 554** | 2129** |
| Sum | 1454                                      | 2008  | 1598  | 1601  | 1758  | 8419   | 2011                                     | 1118 | 2071  | 1351  | 2135  | 8686  | 2021             | 1249  | 1985  | 1370  | 2260  | 8885   |

Blue digits describe an over-representation and red digits an under-representation and stars indicate significance levels for biases from an average distribution determined by chi-square tests for comparison of two proportions (\* $P < 0.05$ , \*\* $P < 0.01$ )

J = Translation, K = Transcription, L = Replication, recombination and repair, D = Cell cycle control, V = Defense mechanisms, T = Signal transduction mechanisms, M = Cell wall/membrane biogenesis, N = Cell motility, U = Intracellular trafficking and secretion, O = Posttranslational modification, protein turnover, chaperons, C = Energy production and conversion, G = Carbohydrate transport and metabolism, E = Amino acid transport and metabolism, F = Nucleotide transport and metabolism, H = Coenzyme transport and metabolism, I = Lipid transport and metabolism, P = Inorganic ion transport and metabolism, Q = Secondary metabolites biosynthesis, transport and catabolism, R = General function prediction only, S = Function unknown, - = Not in COGs. VP = *V. parahaemolyticus*, VC = *V. cholerae*, VV = *V. vulnificus*, VF = *V. fischeri*, PP = *P. profundum*, ALL = values for all species combined.
